# Supplementary material for: Transcriptomic analysis reveals the roles of microtubule-related genes and transcription factors in fruit length regulation in cucumber (Cucumis sativus L.)
Source: PubMed Central journal article supplement — Sci Rep. 2015 Jan 26;5:8031. doi: 10.1038/srep08031 (PMC5379036; doi:10.1038/srep08031), 2015-01-26
Supplement: srep08031-s1.pdf [file srep08031-s1.pdf]

## **Supplementary information for following article**

### **Comparative transcriptomic analysis reveals the roles of microtubule-related genes and transcription factors in fruit length regulation in cucumber (*Cucumis sativus L.*)**

Li Jiang<sup>1,\*</sup>, Shuangshuang Yan<sup>1,\*</sup>, Wencai Yang<sup>1</sup>, Yanqiang Li<sup>2</sup>, Mengxue Xia<sup>1</sup>, Zijing Chen<sup>1</sup>, Qian Wang<sup>1</sup>, Liying Yan<sup>3</sup>, Xiaofei Song<sup>4</sup>, Renyi Liu<sup>2</sup> and Xiaolan Zhang<sup>1,#</sup>

## Supplemental Figure S1

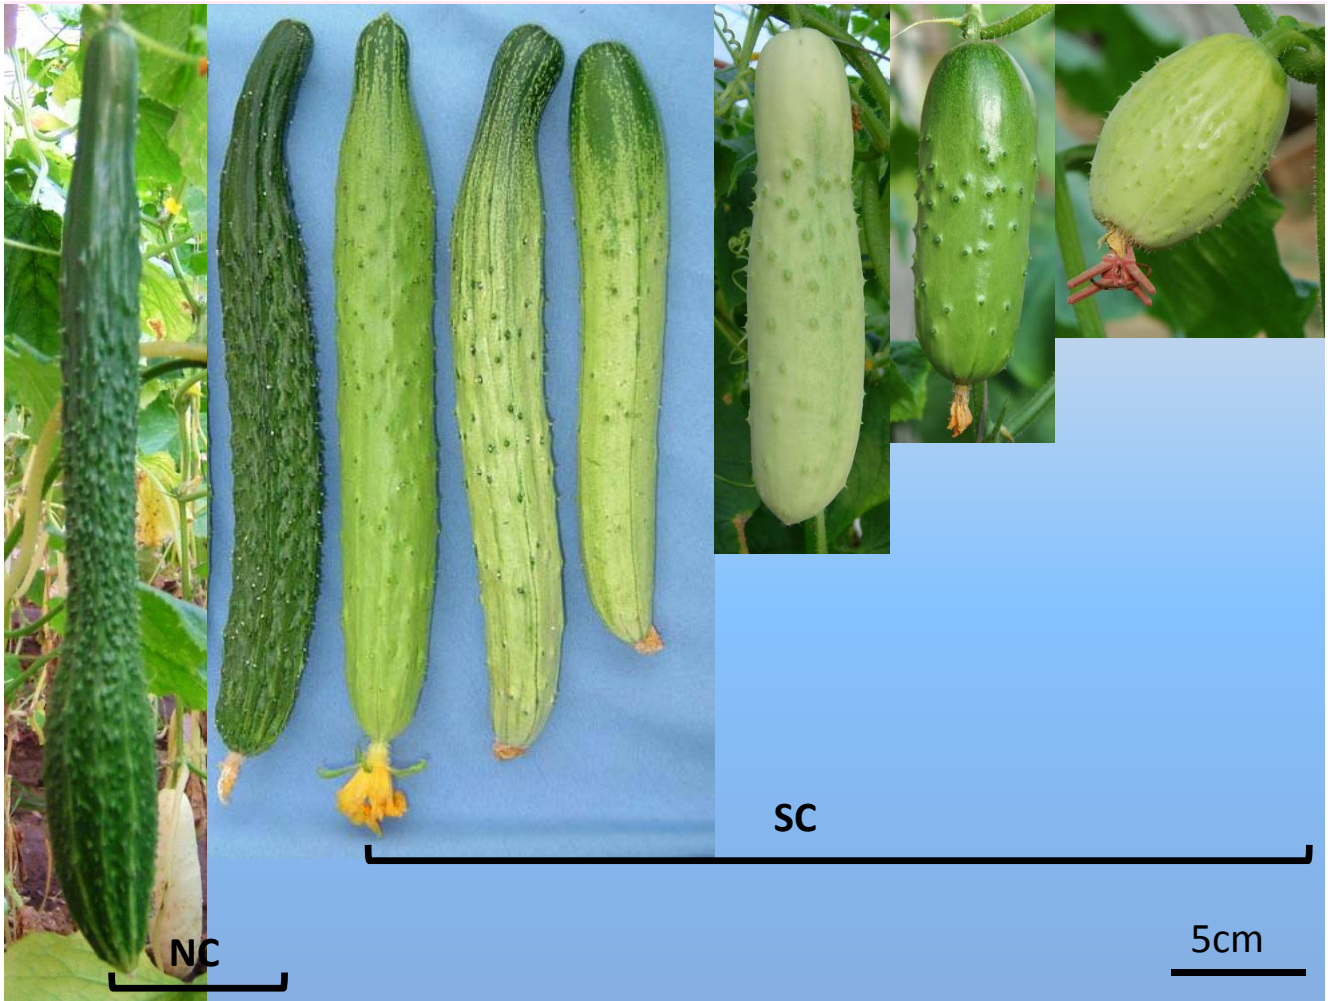

**Supplemental Figure S1. Fruit length variation of major cucumber varieties in China.**

NC: examples of cucumber varieties from northern China. SC: examples of cucumber varieties from southern China.

# Supplemental Figure S2

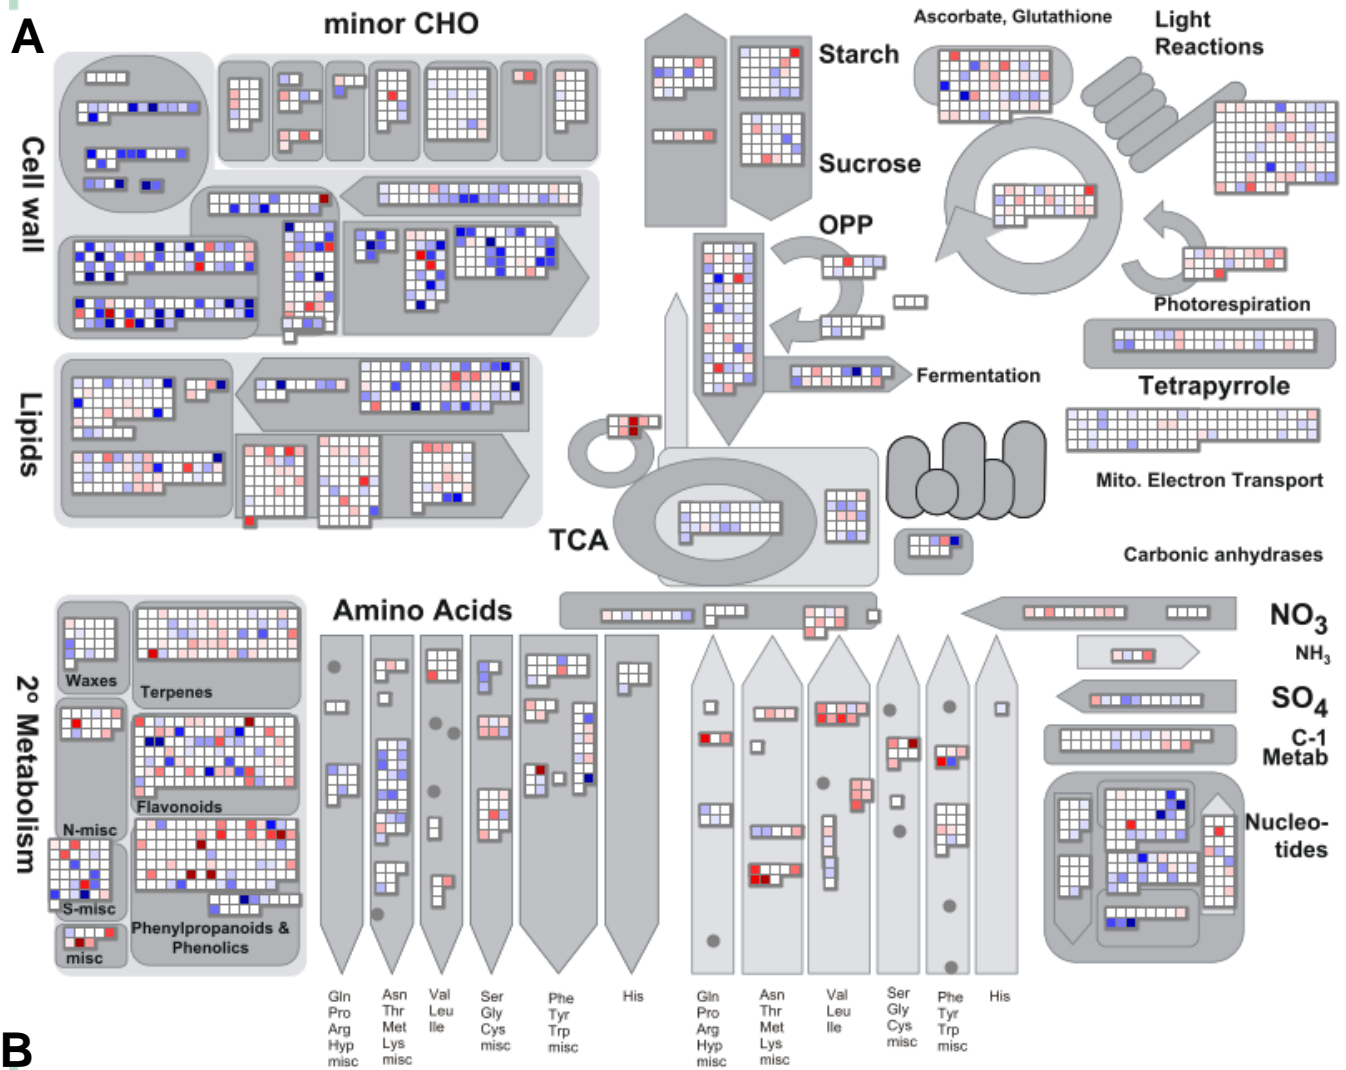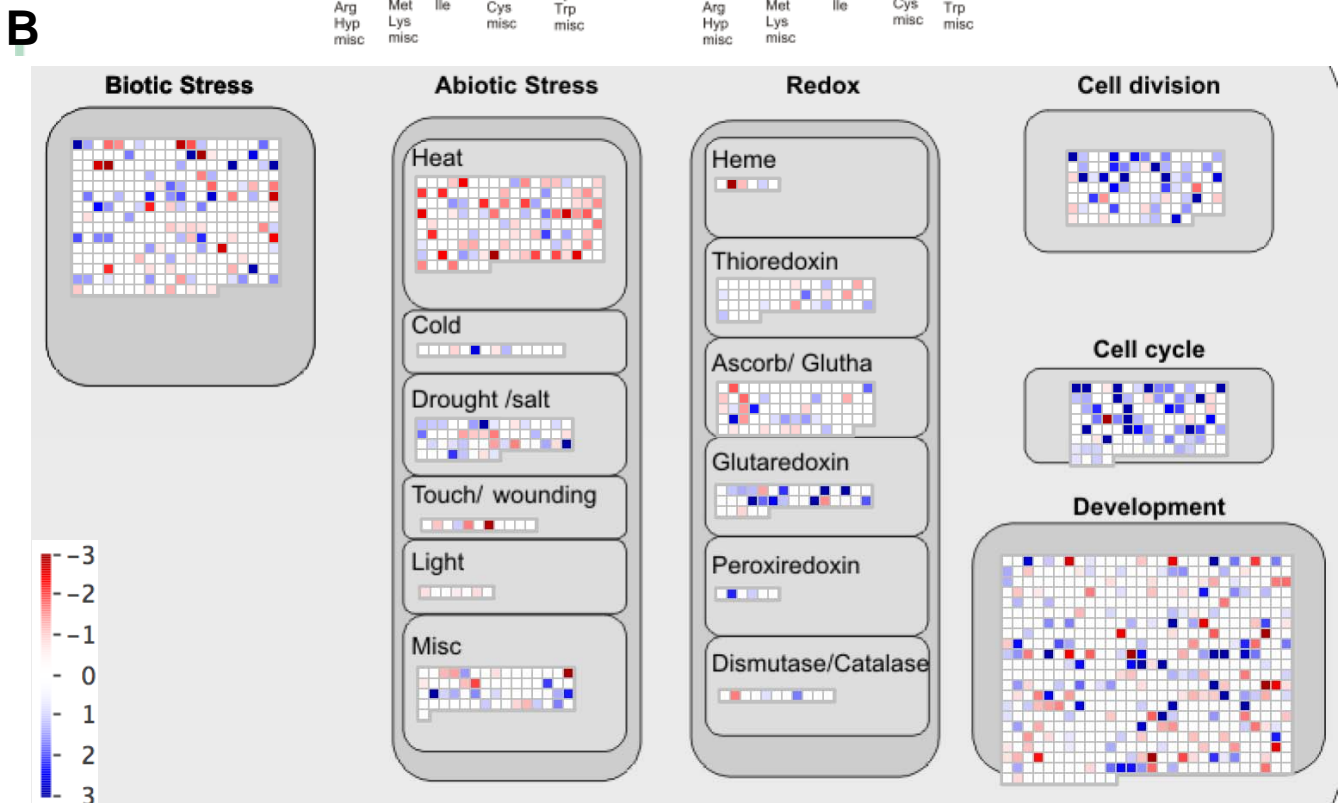

**Supplemental Figure S2. Functional categorization of the differentially expressed genes between the fruit of 408 and 409 using the MapMan software.** Each colored dot represented one gene. The color indicates the log<sub>2</sub> fold changes, red indicates a decrease (lower expression in 408) whereas blue indicates an increase (higher expression in 408). (A) Metabolism overview of the differentially expressed genes between 408 and 409; (B) Cellular response overview of the related genes.

## Supplemental Figure S3

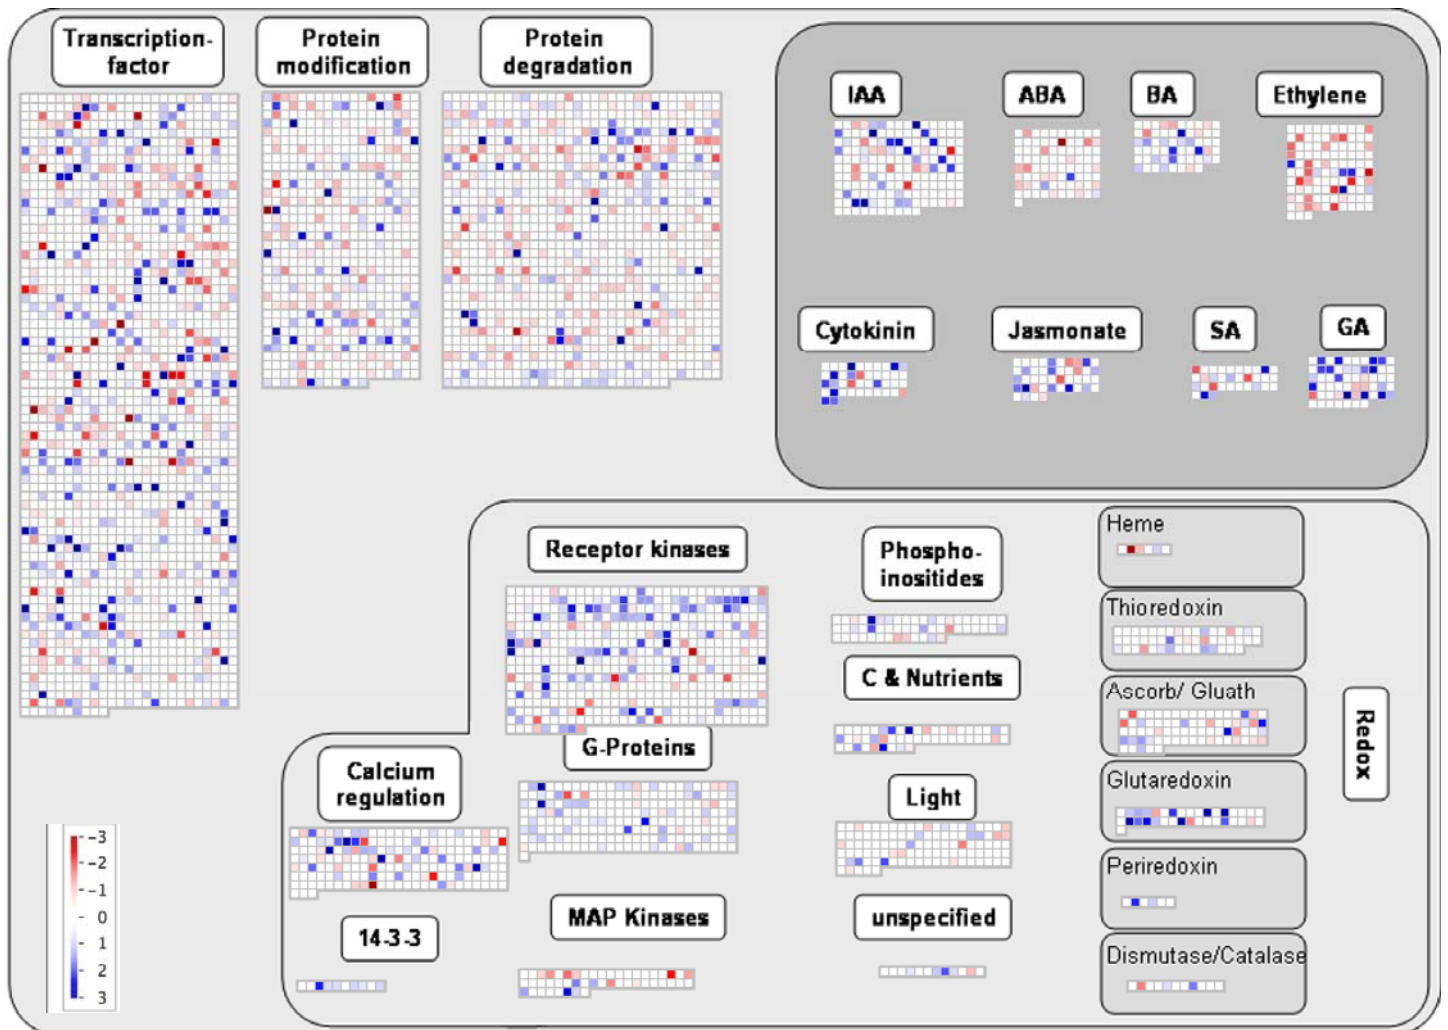

**Supplemental Figure S3. Regulation overview of the differentially expressed genes between line 408 and 409 using the MapMan software.** Each colored dot represented one gene. The color indicates the log<sub>2</sub> fold change, red indicates a decrease (lower expression in 408) whereas blue indicates an increase (higher expression in 408).

**Table S4. Primers used for qRT-PCR assays in this study**

| Primers for qRT-PCR  |                                 |
|----------------------|---------------------------------|
| <i>Csa3G000690-F</i> | 5'-TCAAGGGTTACGGTCGTCAA-3'      |
| <i>Csa3G000690-R</i> | 5'-GAAATGATAAAGAGGATCCGGC-3'    |
| <i>IAA29b-F</i>      | 5'-GATTGGCACACTCAACCTCC-3'      |
| <i>IAA29b -R</i>     | 5'-TTTCCTTGCTATTGCTACCCCT-3'    |
| <i>EXPA16-F</i>      | 5'-AGTATTGATAACCAACGTGGGAGGC-3' |
| <i>EXPA16-R</i>      | 5'-TTTGATTGCCAGTTTTGACCCC-3'    |
| <i>IAA29a-F</i>      | 5'-GTGGGAATTGCTAGGAAGGTTG-3'    |
| <i>IAA29a-R</i>      | 5'-CGTTCTCAGCAAGTAACCATTCA-3'   |
| <i>Csa2G031190-F</i> | 5'-CCTCCAGGATATCAGAACGGTT-3'    |
| <i>Csa2G031190-R</i> | 5'-ATCCACCATTGGTTGTCTTCGT-3'    |
| <i>Csa7G446860-F</i> | 5'-CTGTTGCAGGAAGAGGAAGATC-3'    |
| <i>Csa7G446860-R</i> | 5'-ATAGATTGCTGCAGCCTTTTG-3'     |
| <i>Csa3G062600-F</i> | 5'-CATCAGTTGCAGAGGAGAGTTTTA-3'  |
| <i>Csa3G062600-R</i> | 5'-TCGTCATGATACAGTGGTTCAAG-3'   |
| <i>Csa1G495290-F</i> | 5'-GAATACACGGTTGATGAACCATC-3'   |
| <i>Csa1G495290-R</i> | 5'-CCAGCTAAATGCTTTACATCTCC-3'   |
| <i>Csa4G293320-F</i> | 5'-GATTATCTGGTCGATCAGCATTC-3'   |
| <i>Csa4G293320-R</i> | 5'-GAACTTTTCCTTCTATCAAACCCC-3'  |
| <i>HIK-F</i>         | 5'-TCGCTCGTCAAGCATGAG-3'        |
| <i>HIK-R</i>         | 5'-GGATTTCGTCCAGAGCTTGTTTA-3'   |
| <i>CYCB1;2-F</i>     | 5'-GAGAACGAGAGCAGACCTCA-3'      |
| <i>CYCB1;2-R</i>     | 5'-CAATCTTTGTTCGCAAGGAAA-3'     |
| <i>Csa6G382370-F</i> | 5'-GATTTGTTCGTGCTGCTCAA-3'      |
| <i>Csa6G382370-R</i> | 5'-TAATTCGGCAAGGAAGTTGG-3'      |
| <i>CYCD3;1-F</i>     | 5'-CATGTGGAGGAGAAAGCAGA-3'      |
| <i>CYCD3;1-R</i>     | 5'-TTGATGCTGACACAATCGTC-3'      |
| <i>CDKB1;2-F</i>     | 5'-CAATCCCTCTATGTCGTTTCG-3'     |
| <i>CDKB1;2-R</i>     | 5'-GCTTGAGATCACGGTGAAGA-3'      |
| <i>EXPA5-F</i>       | 5'-GCACGGCGCTTTTCGAT-3'         |
| <i>EXPA5-R</i>       | 5'-TGACACAGCGTAGCTCAAACA-3'     |
| <i>CDKB2;2-F</i>     | 5'-ATATGTGGTCTGTTGCCTGCAT-3'    |
| <i>CDKB2;2-R</i>     | 5'-TCCAGGAAAGAGAGGCTGCTT-3'     |
| <i>EXPA4-F</i>       | 5'-GAGTACCATGCCGTAAGCAA-3'      |
| <i>EXPA4-R</i>       | 5'-CCTGCCACGTTTCGTTATTAG-3'     |
| <i>CUC3-F</i>        | 5'-GGAGTCGGCTTTGTCATCG-3'       |
| <i>CUC3-R</i>        | 5'-TTGTTGGCAGCATTTCGTAAT-3'     |
| <i>HAN-F</i>         | 5'-GGCAACAGGGCACTTACTTC-3'      |
| <i>HAN-R</i>         | 5'-GTTCTTCACGGGCTTCTCG-3'       |
| <i>SPT-F</i>         | 5'-TCGGATTGTAATGTTAGGGATGTG-3'  |
| <i>SPT-R</i>         | 5'-CAGCGCCGGAGGAAGAAAA-3'       |
| <i>UBI-ep-F</i>      | 5'-CACCAAGCCCAAGAAGATC -3'      |
| <i>UBI-ep-R</i>      | 5'-TAAACCTAATCACCACCAGC-3'      |
